# Supplementary material for: Offering male endoscopists as decoy option to nudge disinclined women to have colorectal cancer screening
Source: Springer Nature journal article supplement (doi:10.1007/s10865-019-00095-4), 2019-08-30

# Supplementary files for ‘Offering male endoscopists as decoy option to nudge disinclined women to have colorectal cancer screening’

S1 Figure - Flow through experiment 1

|  | |  | | Started the survey (N=1,216) | | | |  | |  | |
| --- | --- | --- | --- | --- | --- | --- | --- | --- | --- | --- | --- |
|  | |  | | |  |  |  | | | Wrong age or diagnosed with bowel cancer (N=35) | |
|  |  |  | | |
|  | |  | | Eligible for survey (N=1,168) | | | |  | |  | |
|  | |  | | |  |  |  | | | Drop out (N=48) | |
|  |  |  | | |
|  | |  | | Read test description and attempted 1st comprehension check (N=1,120) | | | |  | |  | |
|  | |  | | |  |  |  | | | Drop out (N=3) | |
|  |  |  | | |
|  | |  | | Correctly answered comprehension check and responded to 1st intention question (N=1,117) | | | |  | |  | |
|  | |  | | |  |  |  | | | Probably or definitely intending to do the test (N=808) | |
|  |  |  | | |
|  | |  | | Definitely or probably not intending to do the test (N=309) | | | |  | |  | |
|  | |  |  |  |  |  |  |  |  |  | |
|  |  |  |  |  |  |  |  |
|  | **Control condition** | | | |  | | **Decoy condition** | | | |  |
|  | |  |  |  |  | |  |  |  |  | |
|  | Allocated (N=157) | | | |  | | Allocated (N=152) | | | |  |
|  | |  |  |  |  | |  |  |  |  | |
|  | Finished survey (N=154) | | | |  | | Finished survey (N=148) | | | |  |

S1 Table - Descriptive statistics of the population in experiment 1 (N=302)

|  |  | Control  (N=154) | | Decoy  (N=148) | | Overall  (N=302) | | p-value* |
| --- | --- | --- | --- | --- | --- | --- | --- | --- |
| **Age** | |  |  |  |  |  |  |  |
|  | 35-39 | 51 | (33.1%) | 49 | (33.1%) | 100 | (33.1%) | 0.963 |
|  | 40-44 | 55 | (35.7%) | 50 | (33.8%) | 105 | (34.8%) |
|  | 45-49 | 41 | (26.6%) | 43 | (29.1%) | 84 | (27.8%) |
|  | 50-54 | 7 | (4.5%) | 6 | (4.1%) | 13 | (4.3%) |
| **Living status** | |  |  |  |  |  |  |  |
|  | Single/div./wid.✝ | 64 | (41.6%) | 51 | (34.5%) | 115 | (38.1%) | 0.204 |
|  | Married/cohabiting | 90 | (58.4%) | 97 | (65.5%) | 187 | (61.9%) |
| **Ethnicity** | |  |  |  |  |  |  |  |
|  | White British | 123 | (79.9%) | 122 | (82.4%) | 245 | (81.1%) | 0.569 |
|  | Other | 31 | (20.1%) | 26 | (17.6%) | 57 | (18.9%) |
| **Education** | |  |  |  |  |  |  |  |
|  | No A levels | 60 | (39.0%) | 70 | (47.3%) | 130 | (43.0%) | 0.144 |
|  | A levels or higher | 94 | (61.0%) | 78 | (52.7%) | 172 | (57.0%) |
| **Paid employment** | |  |  |  |  |  |  |  |
|  | No | 56 | (36.4%) | 59 | (39.9%) | 115 | (38.1%) | 0.531 |
|  | Yes | 98 | (63.6%) | 89 | (60.1%) | 187 | (61.9%) |
| **Numeracy question** | |  |  |  |  |  |  |  |
|  | Wrong | 68 | (44.2%) | 77 | (52.0%) | 145 | (48.0%) | 0.171 |
|  | Correct | 86 | (55.8%) | 71 | (48.0%) | 157 | (52.0%) |
| **Cancer literacy (Score 0-6)** | | | |  |  |  |  |  |
|  | Mean and SD | 5.15 | 1.14 | 4.92 | 1.33 | 5.04 | 1.24 | 0.107‡ |
| **Intentions before exposure** | | |  |  |  |  |  |  |
|  | Definitely not | 44 | (28.6%) | 23 | (15.8%) | 67 | (22.3%) | 0.026 |
|  | Probably not | 110 | (71.4%) | 123 | (84.2%) | 233 | (77.7%) |
| **Perceived own risk of bowel cancer** | | | | |  |  |  |  |
|  | Lower than average | 34 | (22.1%) | 26 | (17.6%) | 60 | (19.9%) | 0.511 |
|  | Average | 110 | (71.4%) | 109 | (73.6%) | 219 | (72.5%) |
|  | Higher than average | 10 | (6.5%) | 13 | (8.8%) | 23 | (7.6%) |

*p-value refers to Chi-Square test of independence if not stated differently

‡p-value refers to two sample t test

✝Single, divorced or widowed

S2 Figure – Intentions to attend appointment in experiment 1 (N=302)


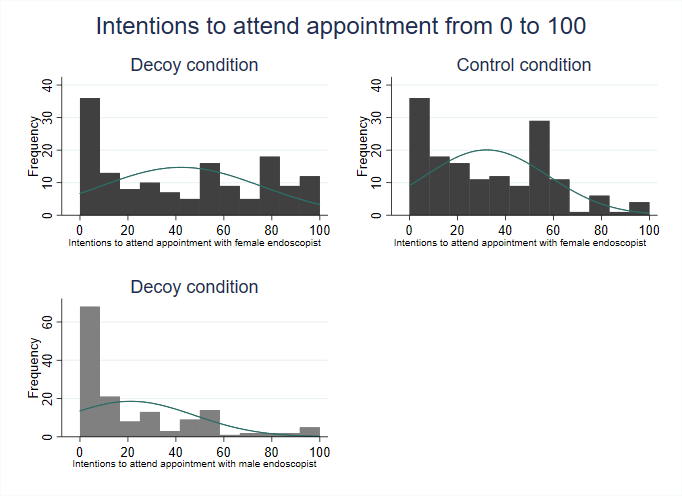


S3 Figure - Effect of decoy on perceived difficulty and cognitive effort in experiment 1


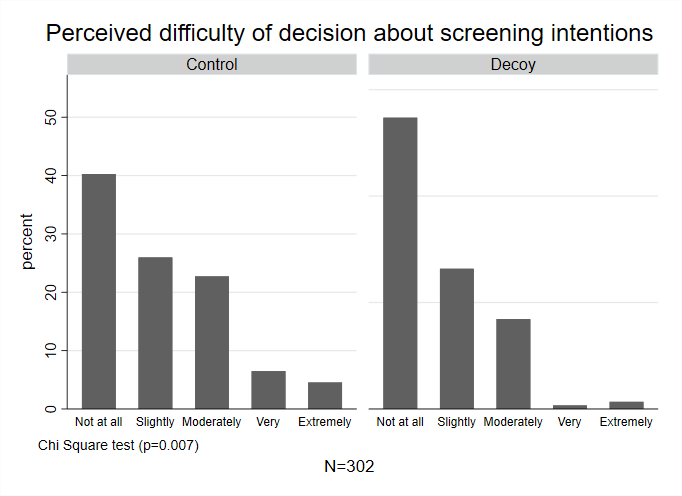


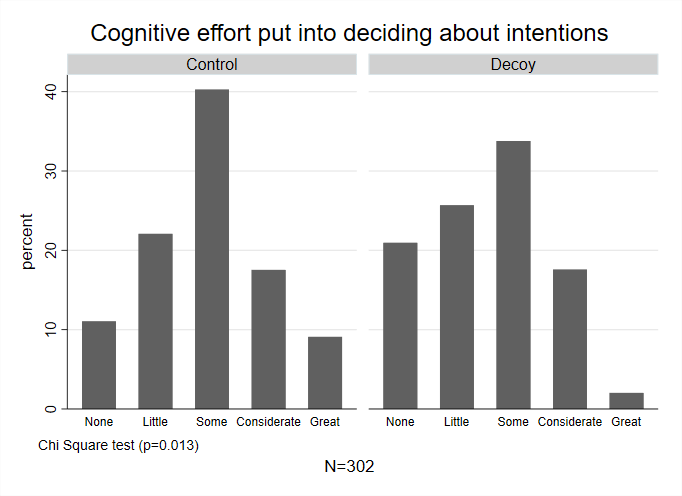


S4 Figure - Flow through experiment 2

|  | |  | | Started the survey (N=1,130) | | | |  | |  | |
| --- | --- | --- | --- | --- | --- | --- | --- | --- | --- | --- | --- |
|  | |  | | |  |  |  | | | Wrong age or diagnosed with bowel cancer (N=43) | |
|  |  |  | | |
|  | |  | | Eligible for survey (N=1,087) | | | |  | |  | |
|  | |  | | |  |  |  | | | Drop out (N=41) | |
|  |  |  | | |
|  | |  | | Read test description and attempted 1st comprehension check (N=1,046) | | | |  | |  | |
|  | |  | | |  |  |  | | | Drop out (N=7) | |
|  |  |  | | |
|  | |  | | Correctly answered comprehension check and responded to 1st intention question (N=1,039) | | | |  | |  | |
|  | |  | | |  |  |  | | | Probably or definitely intending to do the test (N=735) | |
|  |  |  | | |
|  | |  | | Definitely or probably not intending to do the test (N=304) | | | |  | |  | |
|  | |  |  |  |  |  |  |  |  |  | |
|  |  |  |  |  |  |  |  |
|  | **Control condition** | | | |  | | **Decoy condition** | | | |  |
|  | |  |  |  |  | |  |  |  |  | |
|  | Allocated (N=157) | | | |  | | Allocated (N=154) | | | |  |
|  | |  |  |  |  | |  |  |  |  | |
|  | Finished survey (N=154) | | | |  | | Finished survey (N=146) | | | |  |

S2 Table - Descriptive statistics of the population in experiment 2 (N=300)

|  |  | Control  (N=154) | | Decoy  (N=146) | | Overall  (N=300) | | p-value* |
| --- | --- | --- | --- | --- | --- | --- | --- | --- |
| **Age** | |  |  |  |  |  |  |  |
|  | 35-39 | 41 | (26.6%) | 27 | (18.5%) | 68 | (22.7%) | 0.286 |
|  | 40-44 | 33 | (21.4%) | 38 | (26.0%) | 71 | (23.7%) |
|  | 45-49 | 43 | (27.9%) | 38 | (26.0%) | 38 | (27.0%) |
|  | 50-54 | 37 | (24.0%) | 43 | (29.5%) | 43 | (26.6%) |
| **Living status** | |  |  |  |  |  |  |  |
|  | Single/div./wid.✝ | 57 | (37.0%) | 60 | (41.1%) | 117 | (39.0%) | 0.469 |
|  | Married/cohabiting | 97 | (63.0%) | 86 | (58.9%) | 183 | (61.0%) |
| **Ethnicity** | |  |  |  |  |  |  |  |
|  | White British | 129 | (83.8%) | 126 | (86.3%) | 255 | (85.0%) | 0.539 |
|  | Other | 25 | (16.2%) | 20 | (13.7%) | 45 | (15.0%) |
| **Education** | |  |  |  |  |  |  |  |
|  | No A levels | 58 | (37.7%) | 54 | (37.0%) | 112 | (37.3%) | 0.904 |
|  | A levels or higher | 96 | (62.3%) | 92 | (63.0%) | 188 | (62.7%) |
| **Paid employment** | |  |  |  |  |  |  |  |
|  | No | 58 | (37.7%) | 52 | (35.6%) | 110 | (36.7%) | 0.713 |
|  | Yes | 96 | (62.3%) | 94 | (64.4%) | 190 | (63.3%) |
| **Numeracy question** | |  |  |  |  |  |  |  |
|  | Wrong | 65 | (42.2%) | 75 | (51.4%) | 140 | (46.7%) | 0.112 |
|  | Correct | 89 | (57.8%) | 71 | (48.6%) | 160 | (53.3%) |
| **Cancer literacy (Score 0-6)** | | | |  |  |  |  |  |
|  | Mean and SD | 4.90 | 1.31 | 5.02 | 1.16 | 4.96 | 1.23 | 0.284‡ |
| **Intentions before exposure** | | |  |  |  |  |  |  |
|  | Definitely not | 32 | (24.8%) | 24 | (16.4%) | 56 | (20.4%) | 0.008 |
|  | Probably not | 97 | (75.2%) | 122 | (83.6%) | 219 | (79.6%) |
| **Perceived own risk of bowel cancer** | | | | |  |  |  |  |
|  | Lower than average | 28 | (18.2%) | 30 | (20.5%) | 58 | (19.3%) | 0.044 |
|  | Average | 111 | (72.1%) | 112 | (76.7%) | 223 | (74.3%) |
|  | Higher than average | 15 | (9.7%) | 4 | (2.7%) | 19 | (6.3%) |

*p-value refers to Chi-Square test of independence if not stated differently

‡p-value refers to two sample t test

✝Single, divorced or widowed

S5 Figure - Effect of decoy on perceived difficulty and cognitive effort in experiment 2


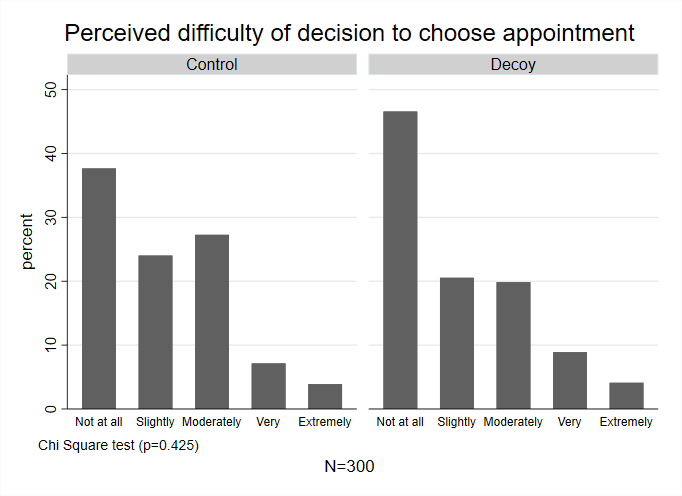


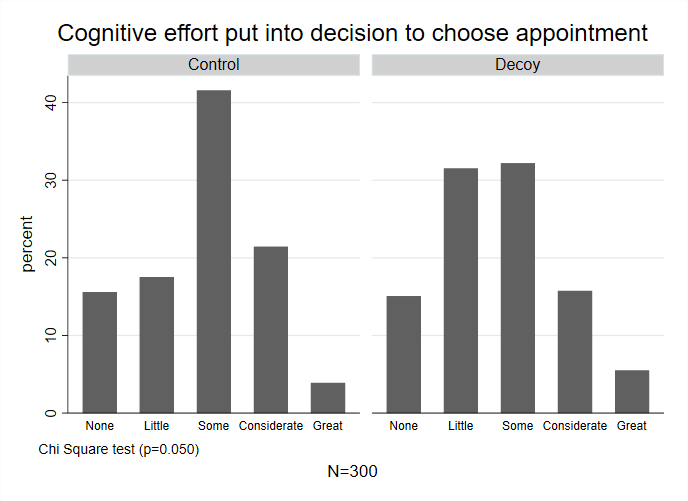

Supplement: MOESM1 [file 17123696]
